# Supplementary material for: Growth window optimization for large-size quasi-two-dimensional Dion–Jacobson type perovskites
Source: Royal Society of Chemistry journal article supplement (doi:10.1039/d4cc06234e), 2024-12-23
Supplement: d4cc06234e1.pdf [file d4cc06234e1.pdf]

## Growth window optimization for large-size quasi two-dimensional Dion-Jacobson type perovskite

*Yinghao Fan<sup>a</sup>, Hang Yin<sup>b</sup>, Xinyi Li<sup>a</sup>, Jiafu Yu<sup>a</sup>, Yue Hu<sup>c</sup>, Yuting Gao<sup>a\*</sup>, Guangda*

*Niu<sup>b\*</sup>*

<sup>a</sup>Engineering Research Center of Nano-Geomaterials of the Ministry of Education, Faculty of Materials Science and Chemistry, China University of Geosciences, Wuhan, 430074, China.

<sup>b</sup>Wuhan National Laboratory for Optoelectronics and School of Optical and Electronic Information, Huazhong University of Science and Technology, Wuhan 430074, China.

<sup>c</sup>School of Chemistry, University of Edinburgh, Kings Buildings, Edinburgh EH9 3FJ, U.K.

\*Corresponding Authors: Yuting Gao, Guangda Niu.

Email: gaoyt@cug.edu.cn, guangda\_niu@hust.edu.cn.

### METHODS

#### Materials preparation

Lead (II) bromide (PbBr<sub>2</sub>, 99.5%), hydrobromic acid (HBr, 48 wt%), 3-(aminomethyl)pyridine (3AMPY, 99 wt%), and methylamine bromide (CH<sub>6</sub>BrN, 98%) were purchased from Anegi Reagent Co. Ltd (Shanghai, China). All reagents and solvents in this experiment were of reagent grade and could be used without further purification.

#### Preparation of (3AMPY)(MA)Pb<sub>2</sub>Br<sub>7</sub> SCs

To prepare (3AMPY)(MA)Pb<sub>2</sub>Br<sub>7</sub> microcrystals, 3 mmol of PbBr<sub>2</sub> (1.101 g) was dissolved in 12 mL of HBr solution. Subsequently, 0.5 mmol of 3AMPY (0.0476 g) was added to the solution, resulting in the formation of a light yellow precipitate. After warming the solution and allowing the precipitate to dissolve, 3 mmol (0.2026 g) of methylamine bromide was added. The mixture was then heated with constant stirring on a magnetic stirrer at 120 °C until the precipitate completely dissolved, producing a clarified solution. The (3AMPY)(MA)Pb<sub>2</sub>Br<sub>7</sub> microcrystals were obtained by rapidly

cooling this solution. To grow larger (3AMPY)(MA)Pb<sub>2</sub>Br<sub>7</sub> single crystals, the saturated solution was transferred to a glass vial and placed in an electrically heated, constant-temperature drying oven at 80 °C and cooled from 80-50 °C at 2 °C per day, Then cooled to room temperature (25 °C) at a rate of 1 °C per day. The ambient temperature was 21 °C, and the humidity was 48%.

### **Materials characterization**

XRD patterns were collected by a Bruker D8 Advance diffractometer in 1° steps. The photoluminescence spectra were tested by a steady-state/transient fluorescence spectrometer (FLS 1000). The absorption spectra were obtained by a UV–vis–NIR spectrophotometer (Shimadzu UV-3600i Plus). SCXRD data at room temperature were collected by using a Bruker D8 Venture diffractometer with Mo Ka radiation ( $\lambda = 0.77$  Å). The crystal structures of (3AMPY)(MA)Pb<sub>2</sub>Br<sub>7</sub> were solved by the direct methods and then refined with the full-matrix least-squares technique based on F2 using SHELXLTL software package.

### **Detector performance measurement**

To apply different bias voltages, we utilized the Keithley 6517B Source Meter. For evaluating X-ray detection performance, we employed the Amptek Mini-X2 tube with an Au target (Newton Scientific M237) as the X-ray source. Additionally, we utilised a horizontal displacement stage to move the samples in the X-Y direction. Dose rates were calibrated using accu-diode ionization chambers, including DDX6-W and DDX6-WL (Accu-Gold+, Radcal).

Table S1. Crystal data and structure refinement for (3AMPY)(MA)Pb<sub>2</sub>Br<sub>7</sub>.

| Empirical formula                         | C <sub>7</sub> H <sub>16</sub> Br <sub>7</sub> N <sub>3</sub> Pb <sub>7</sub> |
|-------------------------------------------|-------------------------------------------------------------------------------|
| Formula weight                            | 1115.98                                                                       |
| Temperature/K                             | 296(2)                                                                        |
| Crystal system                            | Monoclinic                                                                    |
| Space group                               | P2 <sub>1</sub> /c                                                            |
| a/Å                                       | 15.559(2)                                                                     |
| b/Å                                       | 17.143(2)                                                                     |
| c/Å                                       | 8.2450(11)                                                                    |
| α/°                                       | 90                                                                            |
| β/°                                       | 97.367(3)                                                                     |
| γ/°                                       | 90                                                                            |
| Volume/Å <sup>3</sup>                     | 2181.1(5)                                                                     |
| Z                                         | 4                                                                             |
| ρ <sub>calc</sub> Mg/m <sup>3</sup>       | 3.398                                                                         |
| μ/mm <sup>-1</sup>                        | 28.233                                                                        |
| F(000)                                    | 1952                                                                          |
| Crystal size/mm <sup>3</sup>              | 0.220×0.200×0.180                                                             |
| θ Range for data collection/°             | 2.376 to 28.355                                                               |
| Index ranges                              | -20≤h≤18, -22≤k≤22, -11≤l≤10                                                  |
| Reflections collected                     | 34760                                                                         |
| Independent reflections                   | 5417 [R(int) = 0.1281]                                                        |
| Data/restraints/parameters                | 5417 / 1 / 176                                                                |
| Goodness-of-fit on F <sup>2</sup>         | 1.006                                                                         |
| Final R indexes [I≥2σ(I)]                 | R1 = 0.0576, wR2 = 0.1051                                                     |
| Final R indexes [all data]                | R1 = 0.1489, wR2 = 0.1347                                                     |
| Largest diff. peak/hole/e Å <sup>-3</sup> | 1.951 and -2.747                                                              |

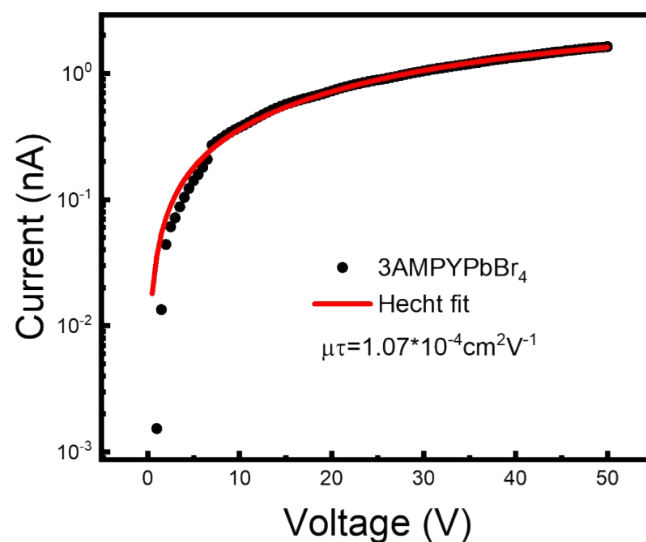Figure S1. 3AMPYPbBr<sub>4</sub> crystal  $\mu\tau$  test results.
